# Supplementary material for: Long-Term Clinical Outcomes and Safety Analysis of Superficial Esophageal Cancer Patients Treated with Definitive or Adjuvant Radiotherapy
Source: MDPI journal article supplement (doi:10.3390/cancers14143423), 2022-07-14
Supplement: s1 [file s1]

**Supplementary Table S1.** Summary of previous studies discussed in the current study

| Year/First Author | Ref. | No. Patients                                 | Stage/No. Patients                       | Methods/No. Patients                  | Result                                                        |
|-------------------|------|----------------------------------------------|------------------------------------------|---------------------------------------|---------------------------------------------------------------|
| 2004/Wang GQ      | [1]  | N = 420 (ESCC)                               | Tis/N = 76<br>T1a/N = 126<br>T1b/N = 218 | Esophagectomy/N= 420                  | 5-year OS:<br>86.1%                                           |
| 2014/Merkow RP    | [4]  | N = 5390<br>4819(Adenocarcinoma)<br>71(ESCC) | T1a/N = 2911<br>T1b/N = 2479             | ER/N = 1428<br>Esophagectomy/N = 3962 | 5-year OS:<br>26.5% vs. 87.6%                                 |
| 2018/Min YW       | [5]  | N = 240 (ESCC)                               | T1a/N = 182<br>T1b/N = 58                | ER/N = 120<br>Esophagectomy/N = 120   | 5-year OS:<br>93.9% vs. 91.2%                                 |
| 2013/Yamashina T  | [9]  | N = 402 (ESCC)                               | T1a/N = 350<br>T1b/N = 52                | ER/N = 402                            | 5-year OS:<br>70.8% (T1b)                                     |
| 2020/Zhang Y      | [10] | N = 70(ESCC)                                 | T1a/N = 70                               | ER/ N = 35<br>ER+RT/ N = 35           | 3-year OS:<br>100% vs. 100%                                   |
| 2012/Motoori M    | [12] | N = 173 (ESCC)                               | T1b/N = 173                              | Esophagectomy/N = 102<br>dCRT/N = 71  | 3-year OS:<br>87.0% vs. 77.8%<br>5-year OS:<br>77.7% vs.68.6% |
| 2021/Jo YY        | [13] | N = 282 (ESCC)                               | T1b/N = 282                              | Esophagectomy/N = 238<br>dCRT/N = 44  | 5-year OS:<br>75.8% vs. 68.8%                                 |
| 2021/Kato K       | [14] | N = 368 (ESCC)                               | T1b/N = 368                              | Esophagectomy/N = 209<br>dCRT/N = 159 | 5-year OS:<br>86.5% vs. 85.5%                                 |
| 2021/Haneda R     | [15] | N = 68 (ESCC)                                | T1b/N = 68                               | Esophagectomy/N =39<br>d CRT/N = 29   | 5-year OS:<br>92.9% vs. 77.8%                                 |
| 2021/Yang X       | [16] | N = 31 (ESCC = 30)                           | T1a/N = 5                                | ER+ RT/N = 30                         | 5-year OS:                                                    |

|                  |      |                             |                          |                                                  |                                |
|------------------|------|-----------------------------|--------------------------|--------------------------------------------------|--------------------------------|
|                  |      | (Adenosquamous carcinoma=1) | T1b/N = 26               |                                                  | 68.5%                          |
| 2019/Tanaka T    | [21] | N = 52 (ESCC)               | T1b/N = 52               | ER + Esophagectomy<br>/N = 19<br>ER + CCRT/N =33 | 5-year OS:<br>89.5% vs. 80.3%  |
| 2021/Ikawa T     | [22] | N = 96 (ESCC)               | T1a/N = 32<br>T1/ N = 64 | ER + CCRT/N = (96)                               | 5-year OS:<br>82.4%            |
| 2021/Uchinami Y  | [23] | N = 71 (ESCC)               | T1a/N = 6<br>T1b/N = 65  | RT or CRT/N =26<br>ER + CRT/N =45                | 5-year OS:<br>64.0%            |
| 2018/Yoshimizu S | [26] | N = 64 (ESCC)               | T1b/N = 64               | ER - CRT/N = 21<br>dCRT / N = 43                 | 5-year OS:<br>85.1% vs. 79.1%  |
| 2018/Suzuki G    | [27] | N = 32 (ESCC)               | T1b/N = 32               | ESD + Esophagectomy/N = 16<br>ESD + CRT / N = 16 | 2-year OS:<br>100% vs. 100%    |
| 2015/Kawaguchi   | [30] | N = 47(ESCC)                | T1a/N = 5<br>T1b/N = 65  | ESD + CRT / N =16<br>dCRT/N =31                  | 3-year OS:<br>90.0% vs. 63.2%% |

Abbreviations: ESCC—esophageal squamous cell carcinoma; ESD—endoscopic submucosal dissection; ER—endoscopic resection; OS—overall survival; RT—radiotherapy; CCRT—concurrent chemoradiotherapy; CRT—chemoradiotherapy; dCRT—definitive chemoradiotherapy.
